# Mindfulness-based intervention for very preterm young adolescents: An RCT

Vanessa Siffredi\*<sup>123</sup>, PhD, Maria Chiara Liverani\*<sup>14</sup>, PhD, Petra Susan Hüppi<sup>1</sup>, MD, Lorena Freitas<sup>123</sup>, PhD, Jiske De Albuquerque<sup>1</sup>, PhD, Fanny Gimbert<sup>45</sup>, PhD, Arnaud Merglen<sup>6</sup>, MD, Djalel-Eddine Meskaldji<sup>17</sup>, PhD, Cristina Borradori Tolsa<sup>+1</sup>, MD, Russia Hà-Vinh Leuchter<sup>+1</sup>, MD

\* *Contributed equally as co-first authors*

+ *Contributed equally as co-last authors*

## Affiliations:

<sup>1</sup> Division of Development and Growth, Department of Paediatrics, Gynaecology and Obstetrics, Geneva University Hospitals, Geneva, Switzerland

<sup>2</sup> Institute of Bioengineering, Center for Neuroprosthetics, Ecole Polytechnique Fédérale de Lausanne, Switzerland

<sup>3</sup> Department of Radiology and Medical Informatics, Faculty of Medicine, University of Geneva, Switzerland

<sup>4</sup> SensoriMotor, Affective and Social Development Laboratory, Faculty of Psychology and Educational Sciences, University of Geneva, Geneva, Switzerland

<sup>5</sup> University of Grenoble Alpes, CNRS, LPNC, 38000 Grenoble, France

<sup>6</sup> Division of General Paediatrics, Department of Paediatrics, Gynaecology and Obstetrics, Geneva University Hospitals, Geneva, Switzerland

<sup>7</sup> Institute of Mathematics, Ecole Polytechnique Fédérale de Lausanne, Switzerland

## Address correspondence to:

Russia Hà-Vinh Leuchter

Department of Paediatrics, Gynecology and Obstetrics, Division of Development and Growth, Geneva University Hospitals, Geneva, Switzerland

email: russia.ha-vinhleuchter@hcuge.ch

tel: (+41) 223724352

**Short title:** Mindfulness-based intervention in preterm adolescents

**Funding source:** This study was supported by the Swiss National Science Foundation, No. 324730\_163084 [PI: P.S. Hüppi].

**Role of Funder/Sponsor:** The funder/sponsor did not participate in the work.

**Conflicts of Interest:** The authors have no conflicts of interest relevant to this article to disclose

**Clinical Trial Registration:** ClinicalTrials, NCT04638101. Registered 19 November 2020 - Retrospectively registered, <https://clinicaltrials.gov/show/NCT04638101>.

**Data Sharing Statement:** Deidentified individual participant data (including data dictionaries) will be made available, in addition to study protocols, the statistical analysis plan, and the informed consent form. The data will be made available upon publication to researchers who provide a methodologically sound proposal for use in achieving the goals of the approved proposal. Proposals should be submitted to [Russia.HaVinhLeuchter@unige.ch](mailto:Russia.HaVinhLeuchter@unige.ch).

**Abbreviations:**

RCT - Randomised Controlled Trial  
MBI - Mindfulness-Based intervention  
VPT - Very Preterm  
IG - Intervention Group  
WG - Waiting Group  
WISC-IV - Wechsler Intelligence Scale for Children  
GAI - General Ability Index  
BRIEF - Behaviour Rating Inventory of Executive Function, parent version  
BRI - Behavioural Regulation Index from the BRIEF  
MI - Metacognition Index from the BRIEF  
GEC - Global Executive Composite from the BRIEF  
TCC - Temporal Context Confusion index from the Reality Filtering task  
SDQ - Strength and Difficulties Questionnaire, parent version

**Keywords**

Prematurity; Mindfulness-based intervention; Adolescence

**Contributors' Statement**

Dr Siffredi et Dr Liverani collected data, coordinated and supervised data collection, carried out the statistical analyses, drafted the initial manuscript, reviewed and revised the manuscript.

Professor Hüppi conceptualized and designed the study, reviewed and revised the manuscript, provided funding.

Dr Freitas collected data, reviewed and revised the manuscript.

Dr De Albuquerque collected data, coordinated and supervised data collection, reviewed and revised the manuscript.

Dr Gimbert collected data, coordinated and supervised data collection, reviewed and revised the manuscript.

Dr Merglen conceptualised and designed the study, reviewed and revised the manuscript. He was one of the instructors of the MBI intervention

Dr Borradori Tolsa conceptualised and designed the study, coordinated and supervised data collection, reviewed and revised the manuscript.

Dr Meskaldji supervised statistical analyses, reviewed and revised the manuscript.

Dr Hà-Vinh Leuchter conceptualised and designed the study, coordinated and supervised data collection, supervised statistical analyses, reviewed and revised the manuscript. She was one of the instructors of the MBI intervention.

All authors approved the final manuscript as submitted and agree to be accountable for all aspects of the work.

## **ABSTRACT**

**Objectives:** This randomised controlled trial (RCT) assesses the effectiveness of a Mindfulness-Based Intervention (MBI) in improving executive, behavioural and socio-emotional competences in very preterm young adolescents.

**Methods:** 58 young adolescents aged 10 to 14 years, born before 32 gestational weeks at the Geneva University Hospital, Switzerland, participated in the study. They were randomly assigned to an “intervention” or a “waiting” group and all completed an 8-week MBI in a cross-over design. Executive, behavioural and socio-emotional competences were assessed at three different time points via parent and self-reported questionnaires, neuropsychological testing, and computerised tasks. We analysed data using an intention-to-treat approach with linear modelling. Subgroups of participants based on levels of prematurity were created using k-means clustering.

**Results:** Parent questionnaires revealed a statistically significant immediate effect of MBI with increased executive and behavioural competencies in everyday life. Increased executive competence was also observed on a Flanker task with enhanced speed of processing after MBI. Two subgroups of participants were created based on measures of prematurity, which revealed increased long-term benefits in the moderate-risk that are not observed in the high-risk subgroups of VPT young adolescents.

**Conclusions:** Our findings show a beneficial effect of MBI on executive, behavioural and socio-emotional competences in VPT young adolescents. Moderate-risk and high-risk VPT young adolescents showed different immediate and long-term beneficial effects of the intervention. Our results suggest that MBI is a valuable tool for reducing detrimental consequences of prematurity in young adolescents, especially regarding executive, behavioural and socio-emotional difficulties.

## INTRODUCTION

Follow-up studies indicate that VPT individuals are at increased risk for executive, behavioural and socio-emotional difficulties in childhood that persists into adolescence and adulthood.<sup>1-13</sup> According to the model of Anderson (2002), executive functioning (EF) is essential for goal-directed and adaptive problem-solving and behaviour and it is conceptualised in four distinct subdomains: (i) attentional control, (ii) information processing, (iii) cognitive flexibility, and (iv) goal setting<sup>14</sup>. On the other hand, behavioural and socio-emotional competences refer to a set of skills related to how individuals identify, express, understand, use and regulate their behaviour as well as their emotions and those of others.<sup>15</sup> Importantly, these competences are crucial in daily life activities, with a close link to academic abilities and significant implications on social behaviour.<sup>16-19</sup>

These findings suggest that VPT children and adolescents may benefit from interventions designed to enhance executive, behavioural and socio-emotional competences. In recent years, general interest in the practice and benefits of mindfulness-based interventions (MBI) has increased. Mindfulness is commonly defined as the on-going monitoring of present-moment experience while attending to it with openness, nonjudgment and acceptance.<sup>20</sup> Despite underlying mechanisms are still to be further explored, numerous studies conducted in children and adolescents have shown that MBI can be a valid way to support the development of executive functions, including attentional control and information processing speed, as well as behavioural and socio-emotional competences, such as emotion regulation.

21-29

This randomised controlled trial (RCT) aims to assess the effectiveness of an 8-week MBI in VPT young adolescents aged 10 to 14 years to improve executive, behavioural and socio-

emotional functioning. The age of 10 to 14 years has been targeted as a crucial developmental period during which MBI may be beneficial.<sup>30</sup>

## **METHODS**

The “Mindful preterm teens” study is an RCT of an MBI in VPT adolescents aged 10 to 14 years (Swiss Ethics Committees on research involving humans, ID: 2015-00175), see Siffredi, Liverani and colleagues for a detailed description.<sup>31</sup> Written informed consent was obtained from primary caregivers and participants.

### Participants

One hundred and sixty-five VPT young adolescents were invited to participate in the study. They were aged 10 to 14 years, born before 32 gestational weeks between 01.01.2003 and 31.12.2008 in the Neonatal Unit at the Geneva University Hospital, Switzerland, and received follow-up care at the Division of Child Development and Growth at the Geneva University Hospital. VPT young adolescents were excluded if they had an intelligence quotient below 70, sensory or physical disabilities (cerebral palsy, blindness, hearing loss), or an insufficient understanding of French. Moreover, some families declined to participate due to lack of time, lack of interest, geographical constraints or unreachability. Out of the 165 young adolescents invited to participate, 56 (33.9%) were enrolled in the RCT, see Figure 1.

### Procedures

Once enrolled in the RCT, families were allocated to the intervention group (IG) or the waiting group (WG) with a cross-over RCT design, see Figure 2. All participants completed a baseline assessment to evaluate general intellectual functioning and demographic characteristics. Additional assessments were completed at three different time points, where outcome measures were collected via parent-report and self-report questionnaires,

neuropsychological assessments and computerised neurocognitive tasks. Children from the IG completed the MBI between Time 1 and Time 2. Participants from the WG completed the MBI between Time 2 and Time 3. For all young adolescents involved in the trial, the pre-intervention assessment (i.e., Time 1 for the IG, and Time 2 for the WG) was completed within one month before the first MBI session. The post-intervention assessment (i.e., Time 2 for the IG, and Time 3 for the WG) was completed within one month after the last MBI session. For the IG, the remaining assessment (i.e., Time 3) was completed three months after the post-intervention assessment and will be referred to as “Long term” assessment. For the WG, the remaining assessment (i.e., Time 1) was completed three months before the pre-intervention assessment.

#### Mindfulness-based Intervention

MBI consisted of eight weekly sessions in groups of up to seven participants, lasting ninety minutes, as well as an invitation to practice daily at home. Two instructors were present for each group throughout the intervention. The MBI program used in this study was specifically adapted to adolescents, see Supplementary Methods.

#### Neonatal and Demographic Characteristics

Neonatal characteristics were documented from medical records. In order to estimate general intellectual functioning, the General Ability Index (GAI) from the Wechsler Intelligence Scale for Children – 4th Edition (WISC-IV)<sup>32</sup> was used. Parent-report and self-report demographic questionnaires were used to assess general characteristics of the participant. Socio-economic status was estimated from maternal education and paternal occupation using the validated Largo scale. Higher socio-economic scores reflect lower socio-economic status levels.<sup>33</sup>

## Outcome measures

Participants' executive, behavioural and socio-emotional functioning were assessed using parent-report and self-report questionnaires, neuropsychological testing and computerised neurocognitive tasks, see supplementary Table S1.

### (i) Executive competences measures

Executive competences of young adolescents were assessed using the Behaviour Rating Inventory of Executive Function – parent version (BRIEF),<sup>34</sup> evaluating attention, hyperactivity and impulsivity in everyday life. The BRIEF comprises 86 items over two standardised subscales, the Behavioural Regulation Index (BRI) and the Metacognition Index (MI), as well as a global score called the Global Executive Composite (GEC). Neurocognitive computerised tasks comprised: (i) the Flanker Visual Filtering Task, in which reaction time of the congruent condition was used to assess speed of processing, which belongs to the information processing subdomain, and the inhibition score (reaction time in incongruent conditions – reaction time in congruent conditions) was used as a measure of the attentional control subdomain;<sup>14, 35</sup> (ii) the child-adapted version of the Reality Filtering task, in which the temporal context confusion index (TCC) was used as a reality filtering measure, which involves integration of different executive processes.<sup>36, 37</sup> Neuropsychological testing included the Letter-Number Sequencing subtest from WISC-IV assessing working memory, which belongs to the cognitive flexibility subdomain.<sup>14</sup> Given the strong association between

executive functions and mathematical abilities in children and adolescents,<sup>38, 39</sup> we also used the total score of the Tempo Test Rekenen to assess timed mathematical achievement.<sup>40</sup>

(ii) Behavioural and socio-emotional competences measures

The total score of the Strength and Difficulties Questionnaire – parent version (SDQ) was used to assess behaviour in daily life.<sup>41, 42</sup> Participants completed three self-reported questionnaires: the KIDSCREEN-27 items questionnaire was used to assess the quality of life of the participants;<sup>43</sup> the total score of the Social Goal Scale was used to assess social responsiveness and social relationships; Wentzel<sup>44</sup> and the total score of the Self-Compassion Scale – Short form was used to assess the main components of self-compassion.<sup>45</sup>

Neuropsychological testing included the Affect Recognition subtest (NEPSY-II), giving a total score assessing facial emotional recognition,<sup>46</sup> and the Theory of Mind subtest (NEPSY-II), giving a total score measuring the ability to understand mental functions, such as belief, intention or deception.

## Statistical Analyses

### *Main statistical analyses*

All analyses were based on the intention-to-treat principle. For each outcome measure, raw scores were used to calculate differences between Time 1 and Time 2 (Time 2-Time 1 =  $\Delta 1$ ), and between Time 2 and Time 3 (Time 3 – Time 2 =  $\Delta 2$ ) for each participant, see Figure 2. Negative  $\Delta$  indicates a reduction of the scores between two time points, whereas positive  $\Delta$  indicates an increase in scores between two time points. Linear models were used to evaluate the effect of MBI. Assumptions of linear models were assessed based on visual diagnosis of the distribution of the residuals. We modelled fixed effects of outcome measures as dependent variables and interaction of time (i.e.,  $\Delta 1$  and  $\Delta 2$ ) by group (i.e., IG and WG) as



independent variables. When the model's p-value was significant, we used planned contrasts to compare outcome measures between the different levels of the independent variables time and group:

- we assessed the effect of the intervention immediately after MBI using the planned contrast defined as: "MBI" (i.e.,  $\Delta 1$  of IG and  $\Delta 2$  of WG) versus "treatment as usual" (i.e.,  $\Delta 1$  of WG).
- we assessed delayed effect of MBI using the planned contrast defined as: "long-term" (i.e.,  $\Delta 2$  of IG) versus "treatment as usual" (i.e.,  $\Delta 1$  of WG).
- when the effect of the intervention immediately after MBI was significant ("MBI" versus "treatment as usual"), we assessed the long-term effect of the intervention using the planned contrast defined as: "MBI" (i.e.,  $\Delta 1$  of IG and  $\Delta 2$  of WG) vs "long-term" (i.e.,  $\Delta 2$  of IG).

Effect size and p-values were calculated. The p-values were also corrected for multiple comparisons using the Benjamini and Hochberg method (1995), which controls the False Discovery Rate correction (FDR, q-values  $\leq 0.05$ ).<sup>47</sup> All analyses were performed using R software, version 3.5.2.<sup>48, 49</sup>

### *Subgrouping "Prematurity" analyses*

In order to better understand inter-individual differences, we performed exploratory analyses on specific subgroups of VPT pre-adolescents. Clustering analyses were used to explore whether any treatment effect tested in our RCT varied across subgroups defined by pre-intervention patient characteristics.<sup>50</sup> Subgrouping of participants was determined by K-means clustering and was based on the main properties of premature birth. A subgrouping "prematurity" was created by using the measures of birth weight and gestational age as features to create two groups of VPT participants: the "high-risk" group, including

participants with lower birth weight and lower gestational age, and the “moderate-risk” group, including participants with higher birth weight and higher gestational age. To evaluate the effect of MBI on these subgroups, analyses similar to the section above were conducted.

## **RESULTS**

### Neonatal and demographic characteristics

Neonatal and demographic characteristics of the 56 participants enrolled in the RCT are shown in Table 1. There were no significant differences in demographic and clinical characteristics at the age of 10-14 years between IG and WG (gender, age, index of general cognitive ability and socio-economic status) and the neonatal characteristics between IG and WG (gestational age, head circumference, length of hospitalisation, presence of severe brain lesions and other medical conditions).

### RCT timing

Time differences (in days) between Time 1 and Time 2, as well as between Time 2 and Time 3 were not significantly different between the IG and the WG ( $p=0.496$ ,  $p=0.502$ ), see supplementary Table S2.

### Main Outcomes

#### *Executive competences outcomes*

Planned contrasts “MBI” vs “treatment as usual” showed a significant effect of the MBI on the BRIEF GEC and MI delta scores, reflecting enhanced executive capacities in everyday life ( $p=0.002$  and  $p<0.001$  respectively). This beneficial effect on executive functioning was supported by a significant decrease in delta reaction time on the processing speed measure of Flanker task ( $p<0.001$ ). Planned contrasts “MBI” vs “long-term” showed a significant

increase for both BRIEF GEC and MI delta scores ( $p=0.008$  and  $p=0.002$ ), showing that the beneficial effect of MBI was not maintained three months after the end of the intervention. The planned contrast “treatment as usual” vs “long-term” showed a significant decrease in reaction time on the Flanker task processing speed measure ( $p=0.01$ ), reflecting a long-lasting effect of the MBI on this information processing subdomain, Figure 3. There was no robust effect on other executive scores, Supplementary Tables S3.

#### *Behavioural and socio-emotional competences measures*

The planned contrast “treatment as usual” vs “MBI” showed a significant effect of the MBI on the SDQ delta total score with a significant decrease in scores after MBI ( $p=0.017$ ), reflecting an improvement in general behavioural competences, Figure 3. The planned contrast “MBI” vs “long-term” showed a significant increase in SDQ delta total score, showing that the beneficial effect of MBI was not maintained three months after the end of the intervention. There was no robust effect for the quality of life and socio-emotional competencies, Supplementary Tables S4.

#### *Subgrouping “Prematurity”*

Using K-means clustering, two groups of VPT participants were extracted based on weight and gestational age at birth: the high-risk group [ $n=29$ , gestational age: mean (SD)= 27.91 (1.62); birth weight: mean (SD)= 938.1 (197.08)] and the moderate-risk group [ $n=27$ , gestational age: mean (SD)= 30.63 (0.91); birth weight: mean (SD)= 1583.89 (196.8)].

#### *Executive competences outcomes*

Planned contrasts “treatment as usual” vs “MBI” showed a significant effect of the MBI in both the high- and moderate-risk subgroups for the BRIEF MI (high-risk,  $p=0.016$ ; moderate-

risk,  $p=0.003$ ) with a significant decrease of BRIEF MI delta scores; as well as a decrease in BRIEF GEC delta scores only in the high-risk subgroup ( $p=0.011$ ). The planned contrasts “MBI” vs “long-term” and “treatment as usual” vs “long-term” showed a significant increase in the BRIEF MI and CEG delta scores three months after MBI in the high-risk subgroup only, reflecting that the beneficial effect of MBI was not maintained in this group, Figure 3. For both subgroups, planned contrasts “treatment as usual” vs “MBI” showed a significant decrease in delta reaction time on the Flanker task, reflecting increased processing speed after MBI (high-risk,  $p=0.035$ ; moderate-risk,  $p=0.001$ ). In the moderate-risk subgroup only, planned contrasts “treatment as usual” vs “long-term” showed a significant decrease in reaction time on the Flanker task, reflecting an increase in processing speed that lasted three months after the end of the MBI ( $p=0.001$ ), Figure 3. There was no robust effect for the other executive scores, Supplementary Tables S5 and S6.

#### *Behavioural and socio-emotional competences outcomes*

For significant linear models adjusted for multiple comparisons, planned contrasts “treatment as usual” vs “MBI” showed a significant increase in self-compassion delta scores after MBI specific to the high-risk subgroup ( $p=0.004$ ), reflecting enhanced self-compassion after MBI, Figure 4. For both the moderate- and the high-risk subgroups, planned contrasts “treatment as usual” vs “long-term” showed a significant increase in self-compassion scores three months after the end of the intervention (moderate-risk,  $p=0.002$ ; high-risk,  $p=0.008$ ). There was no robust effect for the behavioural and quality of life scores, Supplementary Tables S5 and S6.

**Table 1.** Neonatal and demographic characteristics at baseline of young adolescents enrolled in the RCT (n=56), as well intervention group (IG) and waiting group (WG) comparisons

|                                                      | RCT, n=56                     |                            |                                           |
|------------------------------------------------------|-------------------------------|----------------------------|-------------------------------------------|
|                                                      | Intervention group (IG), n=29 | Waiting group (WG), n=27   | Group comparison (IG vs WG)               |
| <b>Neonatal characteristics</b>                      |                               |                            |                                           |
| Birth weight, mean (SD) [range] in grams             | 1284.83 (351.41) [650;1810]   | 1210 (400.85) [520;1980]   | t(54)=0.744, p=0.460                      |
| Gestational age, mean (SD) [range] in days           | 29.29 (1.92) [24.71; 31.86]   | 29.12 (1.93) [26;31.71]    | t(54)=0.317 p=0.753                       |
| Head circumference, mean (SD) [range] in cm          | 26.55 (2.57) [21;31]          | 25.65 (2.82) [21;31]       | t(53)=1.234, p=0.223                      |
| Length of hospitalisation, mean (SD) [range] in days | 59.56 (26.79) [23;131]        | 63 (33.69) [17;151]        | t(52)=-0.416,p=0.679                      |
| Multiple births, n (%)                               | 13 (44.8%)                    | 7 (25.9%)                  | $\chi^2(2)=2.202$ , p=0.333               |
| cPVL, n(%)                                           | 1 (3.4%)                      | 0                          | $\chi^2(1)=0.903$ , p=0.342               |
| IVH - Grades III and IV, n (%)                       | 0 (0%)                        | 0 (0%)                     | -                                         |
| BPD, n (%)                                           | 5 (17.2%)                     | 6 (22.2%)                  | $\chi^2(1)=0.534$ , p=0.465               |
| <b>Demographic characteristics</b>                   |                               |                            |                                           |
| Gender                                               | Female, n                     | 14 (48.3%)                 | 16 (59.3%)<br>$\chi^2(1)=0.678$ , p=0.410 |
|                                                      | Male, n                       | 15 (51.7%)                 |                                           |
| Age at baseline, mean (SD) [range] in years          | 12.05 (1.23) [10.08;14.24]    | 12.26 (1.37) [10.38;14.85] | t(50)=-0.585, p=0.561                     |
| Index of general ability (GAI), mean (SD) [range]    | 106.67 (11.47) [83;132]       | 108.76 (11.23) [87;130]    | t(50)=-0.664, p=.0.510                    |
| Socio-economic status (SES), mean (SD) [range]       | 4.78 (2.62) [2;12]            | 3.76 (2.35) [2;12]         | t(50)=1.470, p=0.148                      |

Abbreviations: Cystic Periventricular Leukomalacia = cPVL, Intraventricular haemorrhage = IVH, Bronchopulmonary dysplasia = BPD. Note: Independent-sample t-test, Chi-square was used to compare the randomised groups

## **DISCUSSION**

This RCT assessed the effectiveness of an 8-week MBI in VPT young adolescents to improve executive, behavioural and socio-emotional competences. Our findings show beneficial effects of MBI immediately after the intervention on executive, behavioural and behavioural competences in every-day life based on parent-reported questionnaires and on processing speed capacities. Subgrouping analyses based on the level of prematurity reveal a larger beneficial effect of MBI immediately after the intervention in the high-risk VPT subgroup, but larger long-lasting effects of the MBI in the moderate-risk VPT subgroup. Our findings lead us to conclude that the use of MBI in VPT young adolescents is effective in improving behavioural as well as executive and socio-emotional outcomes.

Parent-report questionnaires revealed an increase in overall executive competences in everyday life, together with a more specific effect on metacognitive abilities. An enhancement of processing speed on a computerised task corroborates these results reflecting increased skills in the information processing EF subdomains.<sup>14</sup> These findings are in line with previous studies conducted in different populations of children and adolescents showing strong effect of MBI on processing speed.<sup>51-54</sup> Although we found a long-lasting beneficial effect of MBI three months post-intervention on processing speed capacities, the beneficial effect of MBI on overall executive and behavioural competences reported by parents, was not maintained. Subgrouping analyses based on prematurity levels gave valuable insight into these results. In fact, regarding executive competences, the high-risk subgroup appears to benefit slightly better from the MBI immediately post-intervention, with greater enhancement of overall executive competences in daily life, in addition to improvements in metacognitive abilities and processing speed compared to the moderate-risk group. Nevertheless, the decline in executive competences observed three months post-MBI seems mostly driven by the high-

risk subgroup. At the opposite, the long-lasting effect of MBI on processing speed was found only in the moderate-risk group.

When exploring behavioural and socio-emotional competences, our results showed a significant improvement immediately after MBI only on the total score of the SDQ parent-reported questionnaire, reflecting an improvement in general behaviour, but not in the other questionnaires and neuropsychological testing assessing socio-emotional competences. These findings are in line with previous research showing enhancement of behavioural competences after MBI during adolescence.<sup>55-57</sup> Nevertheless, this effect was not maintained three months after the end of the intervention. In regards to self-compassion (self-reported questionnaire), the subgrouping analyses revealed a significant improvement immediately after the MBI only in the high-risk VPT group. In contrast, a significant improvement three months after the end of the MBI was observed in both the high- and moderate-risk groups.

Our study has several strengths. We used gold standard RCT design, recruited a relatively large sample of VPT young adolescents and analysed the data on an intention-to-treat basis. Nevertheless, theoretical and methodological limitations of this study should inform future research. First, the beneficial effect of MBI observed via parent-reported questionnaires might be questionable given the subjective aspect of these tools.<sup>58</sup> Future studies should consider the completion of questionnaires by multiple informants from different settings (e.g. parents and teachers) to give a more objective view of the changes occurring after MBI.<sup>55, 59</sup> Second, one of the main study limitations is the absence of an active control condition or a placebo condition. This would allow participants and their families to be blinded to treatment allocation, as well as help understand what effects are specifically attributable to MBI. Finally, factors such as home environment, caregiver involvement, and motivation to

participate in the training and quantity of home practice were not considered in our study.<sup>60, 61</sup>  
This might influence the outcomes of an MBI and should be considered in future research.

## **CONCLUSION**

In conclusion, this study shows for the first-time beneficial effects of MBI in VPT young adolescents on enhancing executive, behavioural and socio-emotional competences. Subgrouping analyses based on prematurity level reveal a larger beneficial effect of MBI immediately post-intervention in the high-risk subgroup, but a larger long-lasting effect of MBI in the moderate-risk subgroup. We conclude that the use of MBI in VPT young adolescents is effective in improving executive, behavioural and socio-emotional outcomes. However, a longer MBI intervention might be beneficial for high-risk VPT young adolescents. Although future investigations are needed, MBI seems a promising tool to enhance executive, behavioural and socio-emotional outcomes in a vulnerable population such as VPT young adolescents.

## **ACKNOWLEDGMENTS**

We thank and acknowledge all participating young adolescents and families who made this research possible. We also thank the Fondation Campus Biotech Geneva (FCBG), a foundation of the Swiss Federal Institute of Technology Lausanne (EPFL), the University of Geneva (UniGe), and the University Hospitals of Geneva (HUG); the Research Platform of the University Hospitals of Geneva (HUG) for their practical help; as well as Mariana Magnus Smith and Françoise Stuckelberger-Grobéty for their implication as MBI instructors.



## REFERENCES

1. Nosarti C, Giouroukou E, Micali N, Rifkin L, Morris RG, Murray RM. Impaired executive functioning in young adults born very preterm. *Journal of the International Neuropsychological Society : JINS*. 2007;13(4):571-581.
2. Rushe TM, Rifkin L, Stewart AL, Townsend JP, Roth SC, Wyatt JS, et al. Neuropsychological outcome at adolescence of very preterm birth and its relation to brain structure. *Dev Med Child Neurol*. 2001;43(4):226-233.
3. Foulder-Hughes LA, Cooke RW. Motor, cognitive, and behavioural disorders in children born very preterm. *Dev Med Child Neurol*. 2003;45(2):97-103.
4. Bayless S, Stevenson J. Executive functions in school-age children born very prematurely. 2007(0378-3782 (Print)).
5. Anderson PJ, Howard K, Doyle LW. Executive function development in preterm children. In: Nosarti C, Murray RM, Hack M, editors. *Neurodevelopmental Outcomes of Preterm Birth: From Childhood to Adult Life*. Cambridge, UK: University Press; 2010. p. 195-208.
6. Aarnoudse-Moens CS, Weisglas-Kuperus N, van Goudoever JB, Oosterlaan J. Meta-analysis of neurobehavioral outcomes in very preterm and/or very low birth weight children. *Pediatrics*. 2009;124(2):717-728.
7. Mulder H, Pitchford NJ, Hagger MS, Marlow N. Development of Executive Function and Attention in Preterm Children: A Systematic Review. *Developmental Neuropsychology*. 2009;34(4):393-421.
8. Reveillon M, Huppi PS, Barisnikov K. Inhibition difficulties in preterm children: Developmental delay or persistent deficit? *Child Neuropsychol*. 2018;24(6):734-762.
9. Lynn LN, Cuskelly M, O'Callaghan MJ, Gray PH. Self-regulation: a new perspective on learning problems experienced by children born extremely preterm *Australian Journal of Educational & Developmental Psychology*. 2011;11:1-10.
10. Brydges CR, Landes JK, Reid CL, Campbell C, French N, Anderson M. Cognitive outcomes in children and adolescents born very preterm: a meta-analysis. *Dev Med Child Neurol*. 2018;60(5):452-468.
11. Burnett AC, Anderson PJ, Lee KJ, Roberts G, Doyle LW, Cheong JLY, et al. Trends in Executive Functioning in Extremely Preterm Children Across 3 Birth Eras. *Pediatrics*. 2018;141(1).
12. Jones KM, Champion PR, Woodward LJ. Social competence of preschool children born very preterm. *Early human development*. 2013;89(10):795-802.
13. Clark CA, Woodward LJ, Horwood LJ, Moor S. Development of emotional and behavioral regulation in children born extremely preterm and very preterm: biological and social influences. 2008(1467-8624 (Electronic)).
14. Anderson P. Assessment and development of executive function (EF) during childhood. *Child Neuropsychol*. 2002;8(2):71-82.
15. Mikolajczak M, Quoidbach J, Kotsou I, Nelis D. *Les compétences émotionnelles*. Paris, France: Dunod; 2009.
16. Best JR, Miller PH, Naglieri JA. Relations between Executive Function and Academic Achievement from Ages 5 to 17 in a Large, Representative National Sample. *Learning and individual differences*. 2011;21(4):327-336.
17. Vaughan L, Giovanello K. Executive function in daily life: Age-related influences of executive processes on instrumental activities of daily living. *Psychology and aging*. 2010;25(2):343-355.
18. Izard CE. Forms and functions of emotions: Matters of emotion-cognition interactions. *Emotion Review*. 2011;3:371-378.
19. Carter AS, Briggs-Gowan MJ, Davis NO. Assessment of young children's social-emotional development and psychopathology: recent advances and recommendations for practice. *Journal of child psychology and psychiatry, and allied disciplines*. 2004;45(1):109-134.
20. Kabat-Zinn J. Mindfulness-Based interventions in context: Past, present and future. *Clinical Psychology: Science and Practice*. 2003;10:144-156.
21. Flook L, Smalley SL, Kitil MJ, Galla BM, Kaiser-Greenland S, Locke J, et al. Effects of Mindful Awareness Practices on Executive Functions in Elementary School Children. *Journal of Applied School Psychology*. 2010;26(1):70-95.

22. Geronimi EMC, Arellano B, Woodruff-Borden J. Relating mindfulness and executive function in children. *Clinical child psychology and psychiatry*. 2019;1359104519833737.
23. Semple RJ, Lee J, Rosa D, Miller L. A Randomized Trial of Mindfulness-Based Cognitive Therapy for Children: Promoting Mindful Attention to Enhance Social-Emotional Resiliency in Children. *Journal of Child and Family Studies*. 2009;19(2):218-229.
24. Felver JC, Tipsord JM, Morris MJ, Racer KH, Dishion TJ. The Effects of Mindfulness-Based Intervention on Children's Attention Regulation. 2017;21(10):872-881.
25. Flook L, Goldberg SB, Pinger L, Davidson RJ. Promoting prosocial behavior and self-regulatory skills in preschool children through a mindfulness-based Kindness Curriculum. *Developmental psychology*. 2015;51(1):44-51.
26. Schonert-Reichl KA, Oberle E, Lawlor MS, Abbott D, Thomson K, Oberlander TF, et al. Enhancing cognitive and social-emotional development through a simple-to-administer mindfulness-based school program for elementary school children: a randomized controlled trial. *Developmental psychology*. 2015;51(1):52-66.
27. Lee J, Semple RJ, Rosa D, Miller L. Mindfulness-based cognitive therapy for children: results of a pilot study. *J Cogn Psychother*. 2008;22(1):15-28.
28. Beauchemin J, Hutchins TL, Patterson F. Mindfulness meditation may lessen anxiety, promote social skills, and improve academic performance among adolescents with learning disabilities. *Complement Health Pract Rev*. 2008;13(1):34-45.
29. Black DS, Milam J, Sussman S. Sitting-meditation interventions among youth: a review of treatment efficacy. *Pediatrics*. 2009;124(3):e532-541.
30. Kuyken W, Weare K, Ukoumunne OC, Vicary R, Motton N, Burnett R, et al. Effectiveness of the Mindfulness in Schools Programme: non-randomised controlled feasibility study. *The British journal of psychiatry : the journal of mental science*. 2013;203(2):126-131.
31. Siffredi V, Liverani MC, Magnus-Smith M, Meskaldji D, Stuckelberger-Grobety F, Freitas L, et al. Improving executive, behavioural and socio-emotional competences in very preterm young adolescents through a mindfulness-based intervention: study protocol and feasibility. *MedRxiv: <https://www.medrxiv.org/content/101101/2021011921250087v1>*. 2021.
32. Wechsler D. *Manual for the Wechsler Intelligence Scale for Children-IV*. New York: Psychological Corporation; 2003.
33. Largo RH, Pfister D, Molinari L, Kundu S, Lipp A, Duc G. Significance of prenatal, perinatal and postnatal factors in the development of AGA preterm infants at five to seven years. *Dev Med Child Neurol*. 1989;31(4):440-456.
34. Gioia G, Isquith P, Guy S, Kenworthy L. *BRIEF – Behavior Rating Inventory of Executive Function. Professional manual*. Odessa, FL: Psychological Assessment Resources Inc; 2000.
35. Christ SE, Kester LE, Bodner KE, Miles JH. Evidence for selective inhibitory impairment in individuals with autism spectrum disorder. *Neuropsychology*. 2011;25(6):690-701.
36. Liverani MC, Manuel AL, Nahum L, Guardabassi V, Tomasetto C, Schnider A. Children's sense of reality: The development of orbitofrontal reality filtering. *Child neuropsychology : a journal on normal and abnormal development in childhood and adolescence*. 2017;23(4):408-421.
37. Liverani MC, Freitas LGA, Siffredi V, Mikneviciute G, Martuzzi R, Meskaldij DE, et al. Get real: Orbitofrontal cortex mediates the ability to sense reality in early adolescents. *Brain and Behavior*. 2020.
38. Visu-Petra L, Cheie L, Benga O, Miclea M. Cognitive control goes to school: The impact of executive functions on academic performance. *Social and Behavioral Sciences*. 2011;11:240-244.
39. Holmes J, Adams JW. Working Memory and Children's Mathematical Skills: Implications for mathematical development and mathematics curricula. *Educational Psychology*. 2006;26(3).
40. De Vos T. *Tempo Test Rekenen [Tempo Test Arithmetic]. Handleiding Tempo-Test-Rekenen (2nd edition)*. Lisse, The Netherlands: Swets Test Publishers; 1994.
41. Goodman R. The Strengths and Difficulties Questionnaire: a research note. *Journal of child psychology and psychiatry, and allied disciplines*. 1997;38(5):581-586.
42. Goodman R. Psychometric properties of the strengths and difficulties questionnaire. *J Am Acad Child Adolesc Psychiatry*. 2001;40(11):1337-1345.
43. Robitail S, Ravens-Sieberer U, Simeoni MC, Rajmil L, Bruil J, Power M, et al. Testing the structural and cross-cultural validity of the KIDSCREEN-27 quality of life questionnaire. *Qual Life Res*. 2007;16(8):1335-1345.

44. Wentzel KR. Relations of social goal pursuit to social acceptance, classroom behavior, and perceived social support. *Journal of Educational Psychology*. 1994;86(2):173-182.
45. Raes F, Pommier E, Neff KD, Van Gucht D. Construction and factorial validation of a short form of the Self-Compassion Scale. *Clin Psychol Psychother*. 2011;18(3):250-255.
46. Korkman M, Kirk U, Kemp S. *A developmental neuropsychological assessment 2nd Edition : NEPSY-II*. San Antonio, Texas: Pearson; 2007.
47. Benjamini Y, Hochberg Y. Controlling the false discovery rate: a practical and powerful approach to multiple testing. *Journal of the Royal Statistical Society*. 1995;57:289-300.
48. Team R. RStudio: Integrated Development for R, version 1.3 released 18.09.2020. In: RStudio I, editor. Boston, MA 2020. p. <http://www.rstudio.com/>.
49. Team R. R: A language and environment for statistical computing, version R 4.0.3 released 10.10.2020. In: Computing RFFS, editor. Vienna, Austria 2020. <https://www.R-project.org/>.
50. Wang R, Lagakos SW, Ware JH, Hunter DJ, Drazen JM. Statistics in medicine--reporting of subgroup analyses in clinical trials. *N Engl J Med*. 2007;357(21):2189-2194.
51. Huguet A, Ruiz DM, Haro JM, Alda JA. A pilot study of the efficacy of a mindfulness program for children newly diagnosed with Attention-Deficit Hyperactivity Disorder: Impact on core symptoms and executive functions. *International Journal of Psychology and Psychological Therapy*. 2017;17(3):305-316.
52. Mak C, Whittingham K, Cunnington R, Boyd RN. Efficacy of Mindfulness-Based Interventions for Attention and Executive Function in Children and Adolescents—a Systematic Review. *Mindfulness*. 2018(9):59–78.
53. Johansson B, Bjuhr H, Ronnback L. Mindfulness-based stress reduction (MBSR) improves long-term mental fatigue after stroke or traumatic brain injury. *Brain Inj*. 2012;26(13-14):1621-1628.
54. Moore A, Malinowski P. Meditation, mindfulness and cognitive flexibility. *Conscious Cogn*. 2009;18(1):176-186.
55. van de Weijer-Bergsma E, Formsma AR, de Bruin EI, Bogels SM. The Effectiveness of Mindfulness Training on Behavioral Problems and Attentional Functioning in Adolescents with ADHD. *J Child Fam Stud*. 2012;21(5):775-787.
56. Coholic DA, Eys M. Benefits of an Arts-Based Mindfulness Group Intervention for Vulnerable Children. *Child and Adolescent Social Work Journal*. 2016;33:1-13.
57. Schonert-Reichl K, Lawlor MS. The effects of a mindfulness-based education program on pre- and early adolescents' well-being and social and emotional competence. *Mindfulness*. 2010;1(3):137-151.
58. Gough B, Madill A. Subjectivity in psychological science: from problem to prospect. *Psychol Methods*. 2012;17(3):374-384.
59. de Nijs PF, Ferdinand RF, de Bruin EI, Dekker MC, van Duijn CM, Verhulst DC. Attention-deficit/hyperactivity disorder (ADHD): parents' judgment about school, teachers' judgment about home. *European Child and Adolescent Psychiatry*. 2004;13(5):315-320.
60. Jaeggi SM, Buschkuhl M, Shah P, Jonides J. The role of individual differences in cognitive training and transfer. *Memory & cognition*. 2014;42(3):464-480.
61. Shah P, Buschkuhl M, Jaeggi S, Jonides J. Cognitive training for ADHD: The importance of individual differences. *Journal of Applied Research in Memory and Cognition*. 2012;1(3):204–205.

## FIGURE LEGENDS

**Figure 1.** CONSORT flow diagram of the present cross-over RCT design

**Figure 2.** Illustration of the RCT study design. Participants enrolled in the RCT design were randomised in two groups: the intervention group (IG) in blue and the waiting group (WG) in orange.

**Figure 3.** Plots showing the distribution of the delta scores ( $\Delta$ ) of the “Treatment as usual”, “MBI” and “Long-term” groups of the significant planned contrasts only. Lines in the violin plots represent the means for each group.

**Figure 4.** Distribution of the delta scores ( $\Delta$ ) of the “Treatment as usual”, “MBI” and “Long-term” groups for the significant post-hoc tests for the two subgroups of VPT: moderate-risk and high-risk. Lines in the violin plots represent the means for each group.

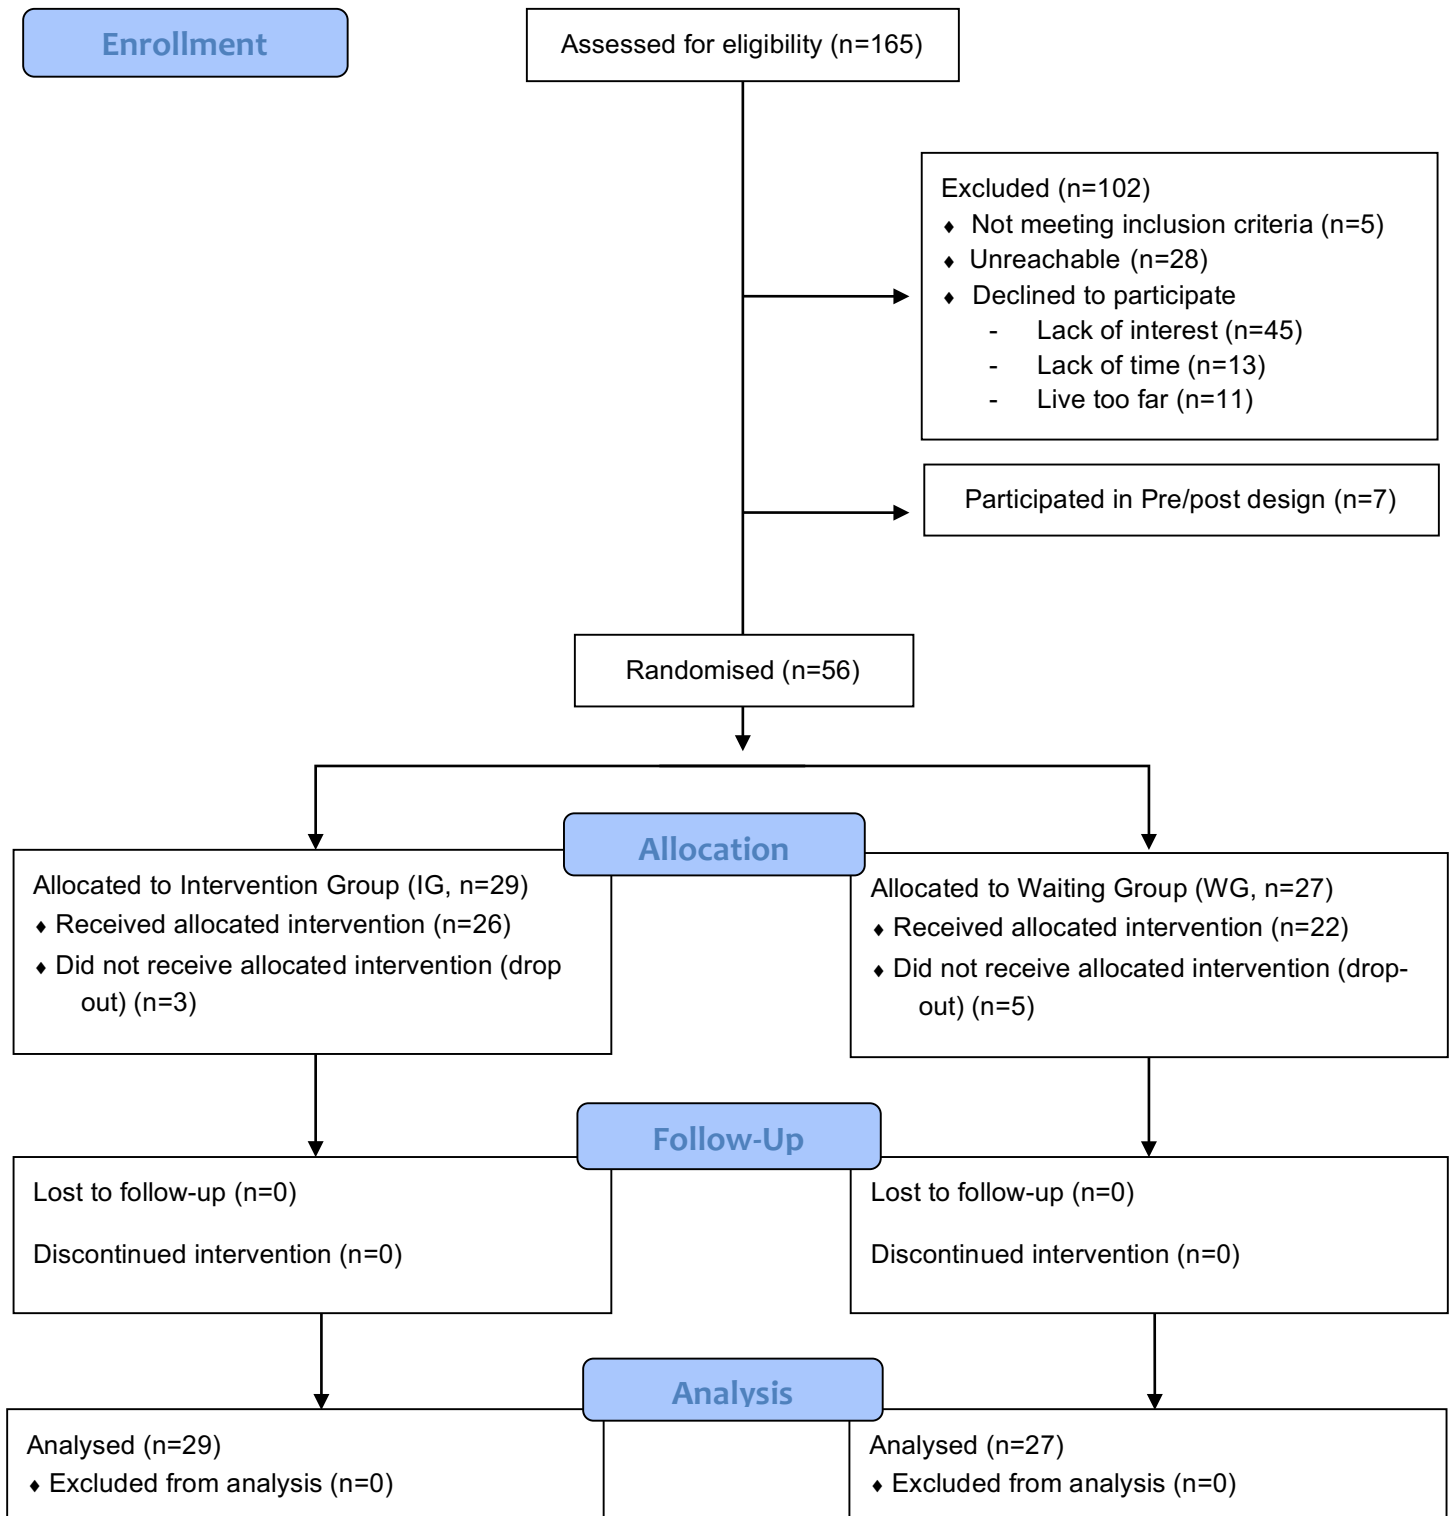

# RCT illustration

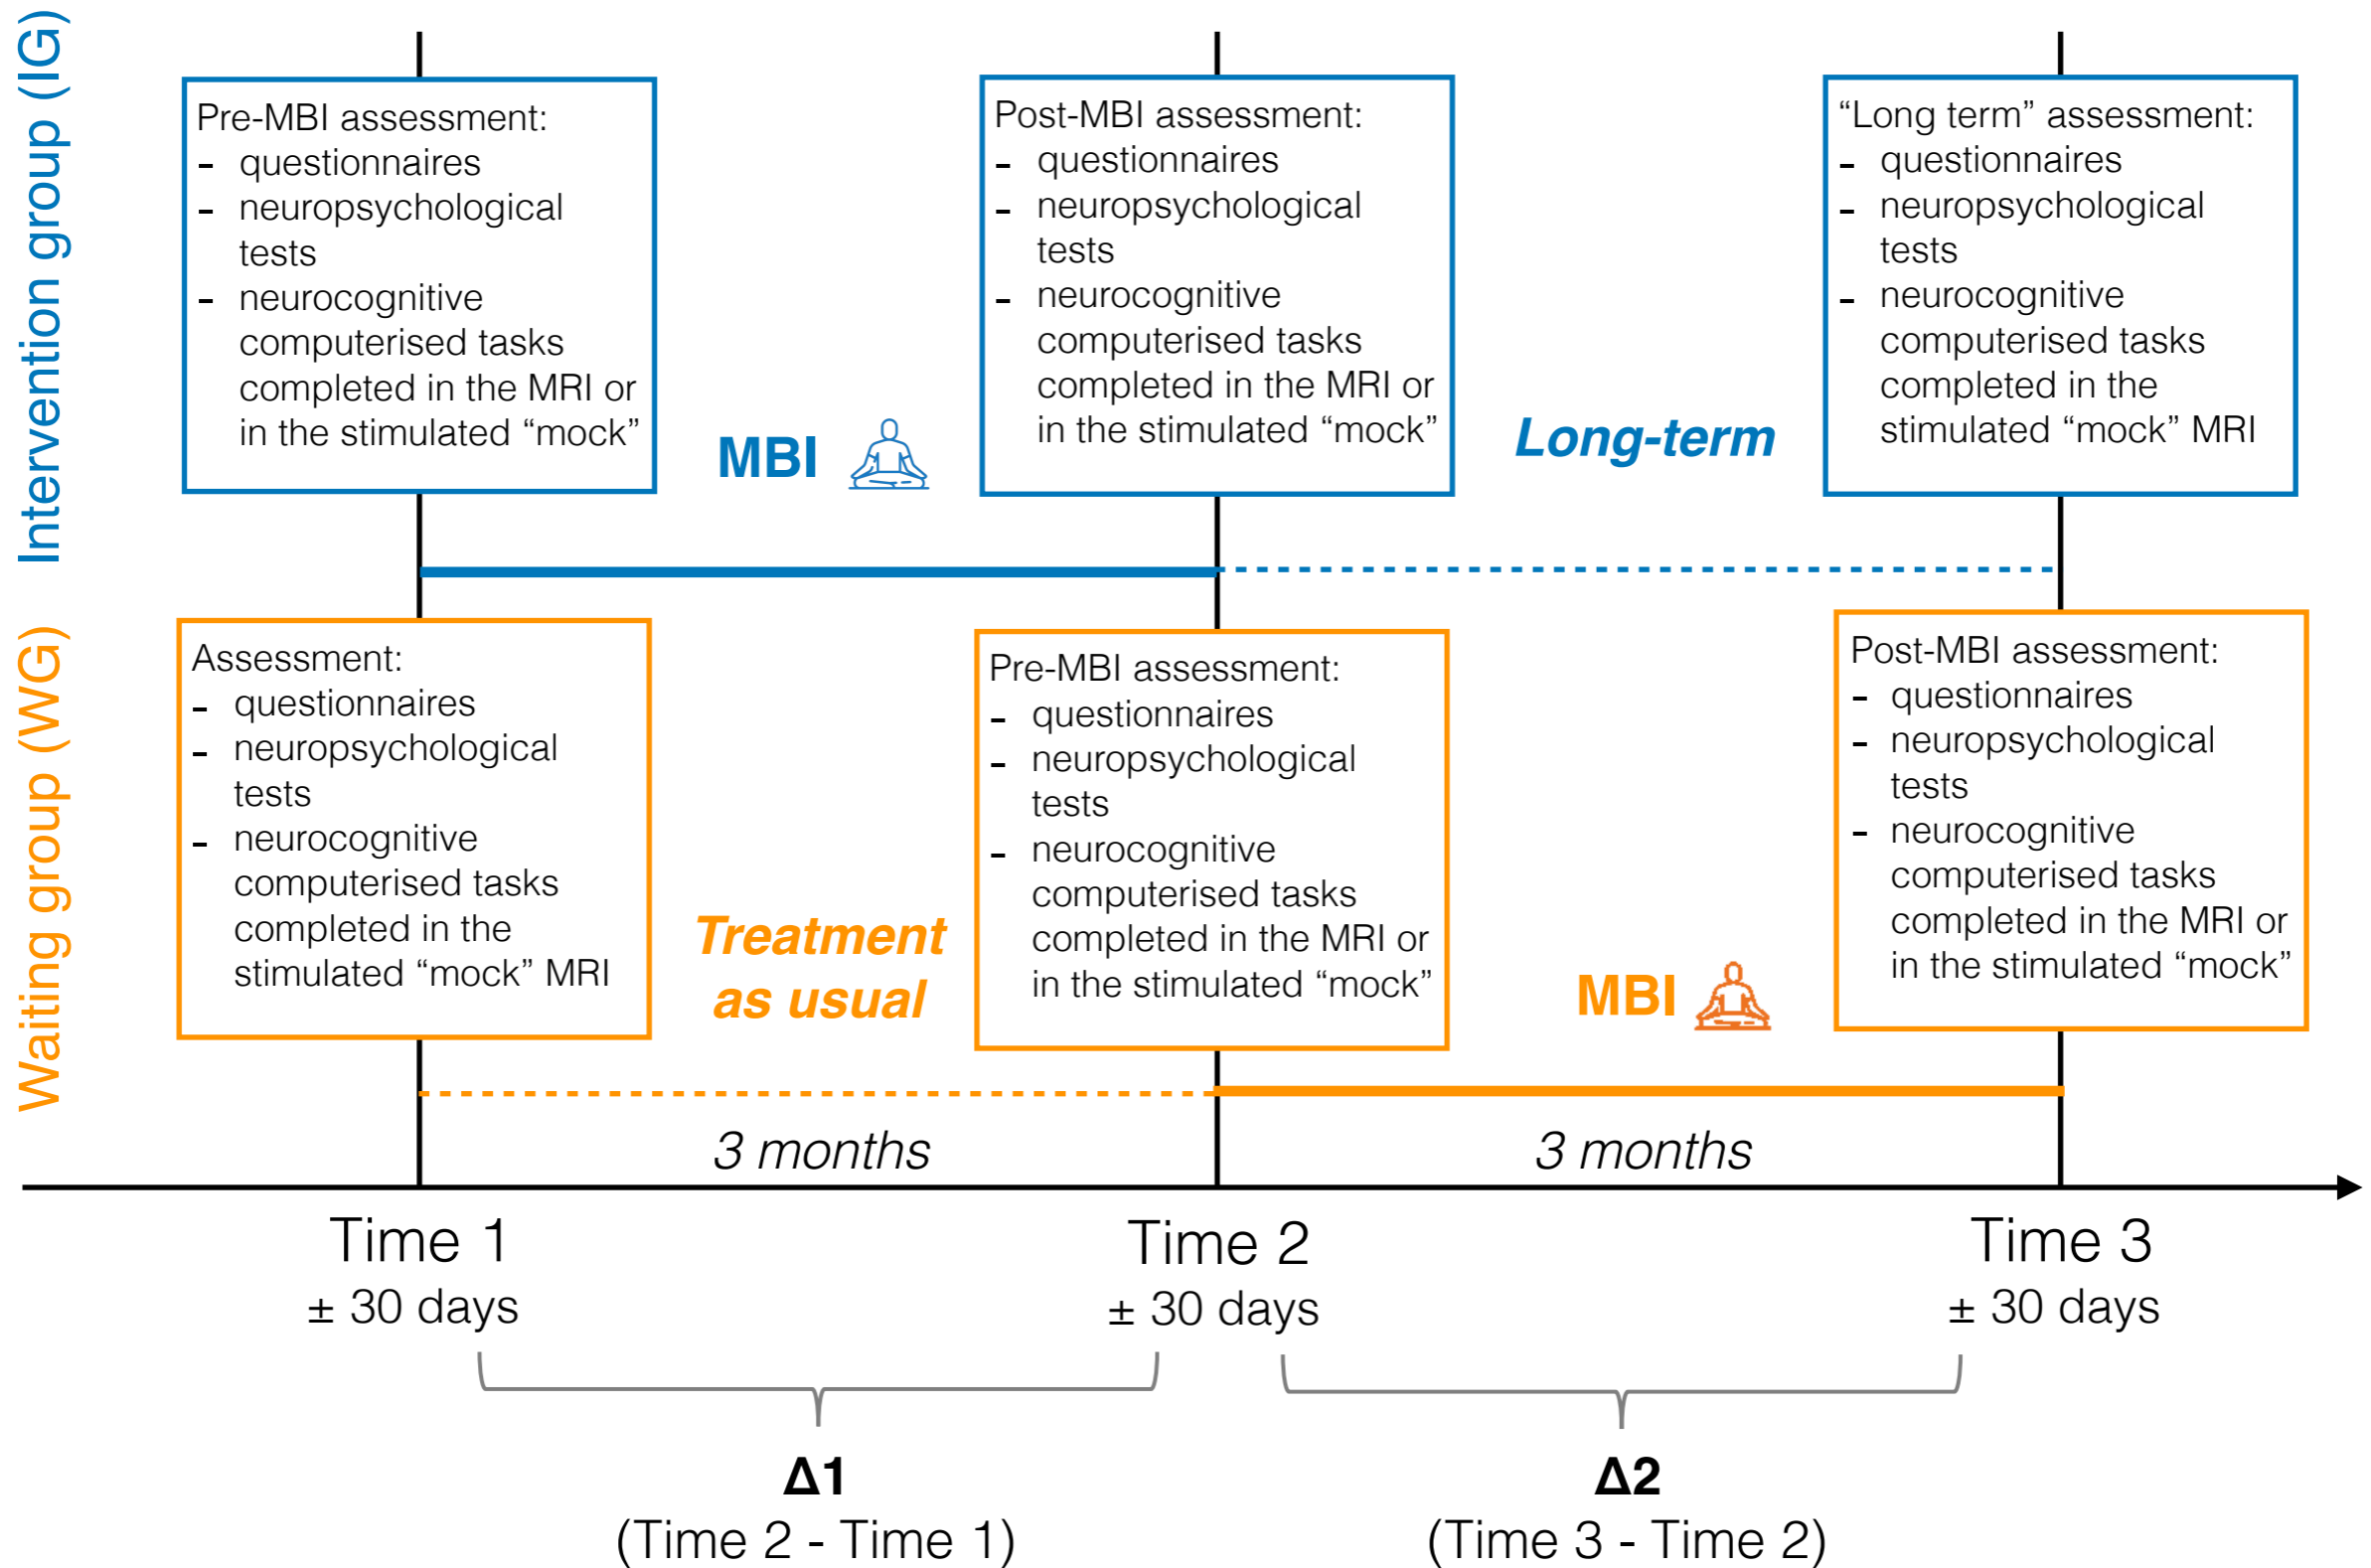

**BRIEF CEG**

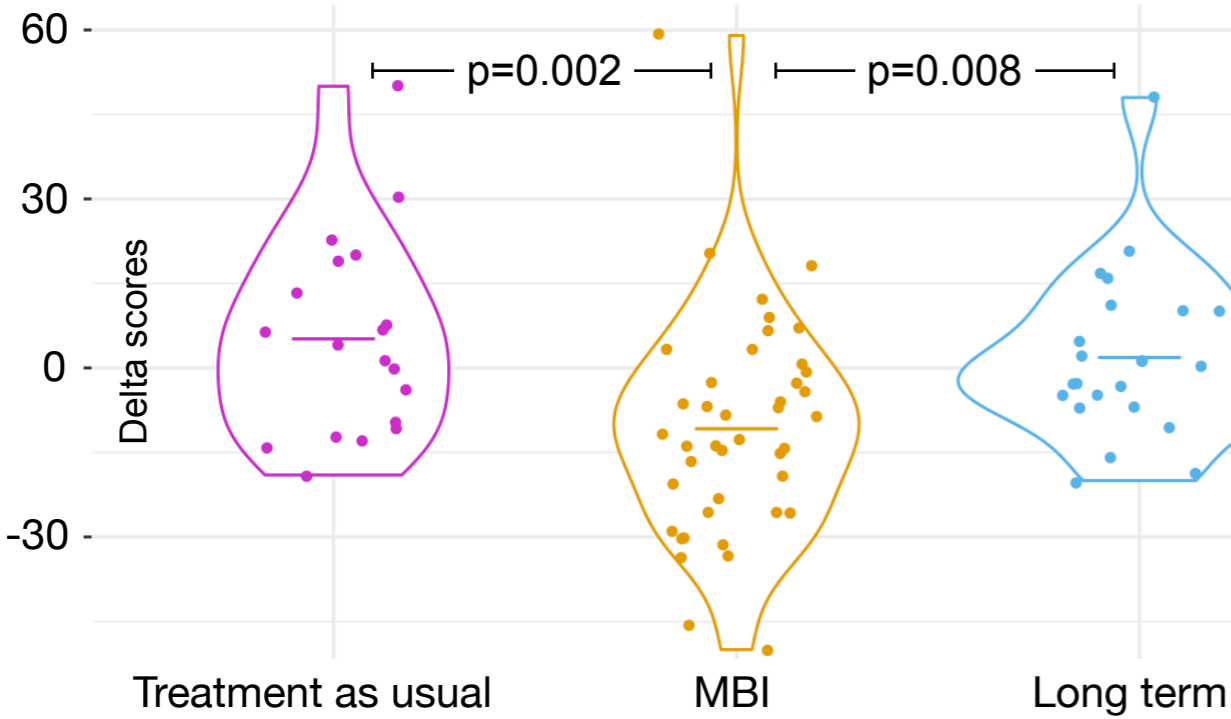

**BRIEF MI**

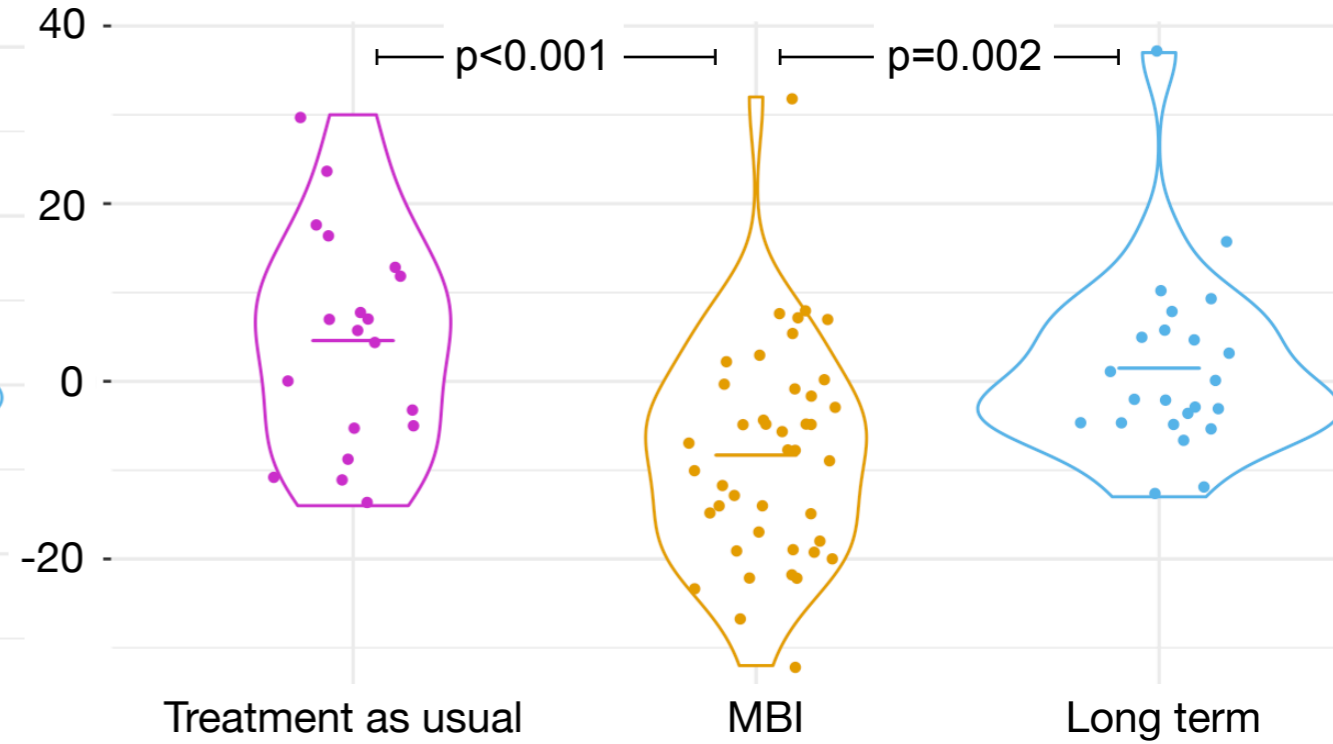

**Flanker processing speed**

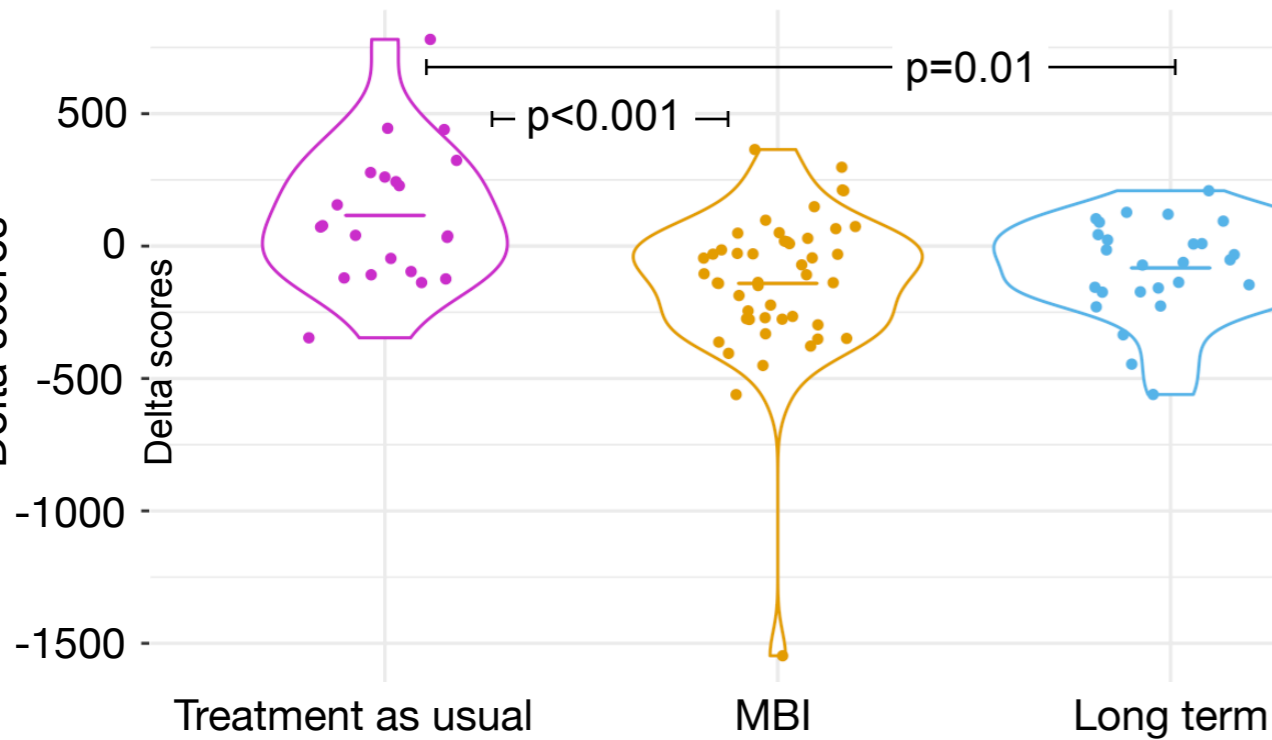

**SDQ total**

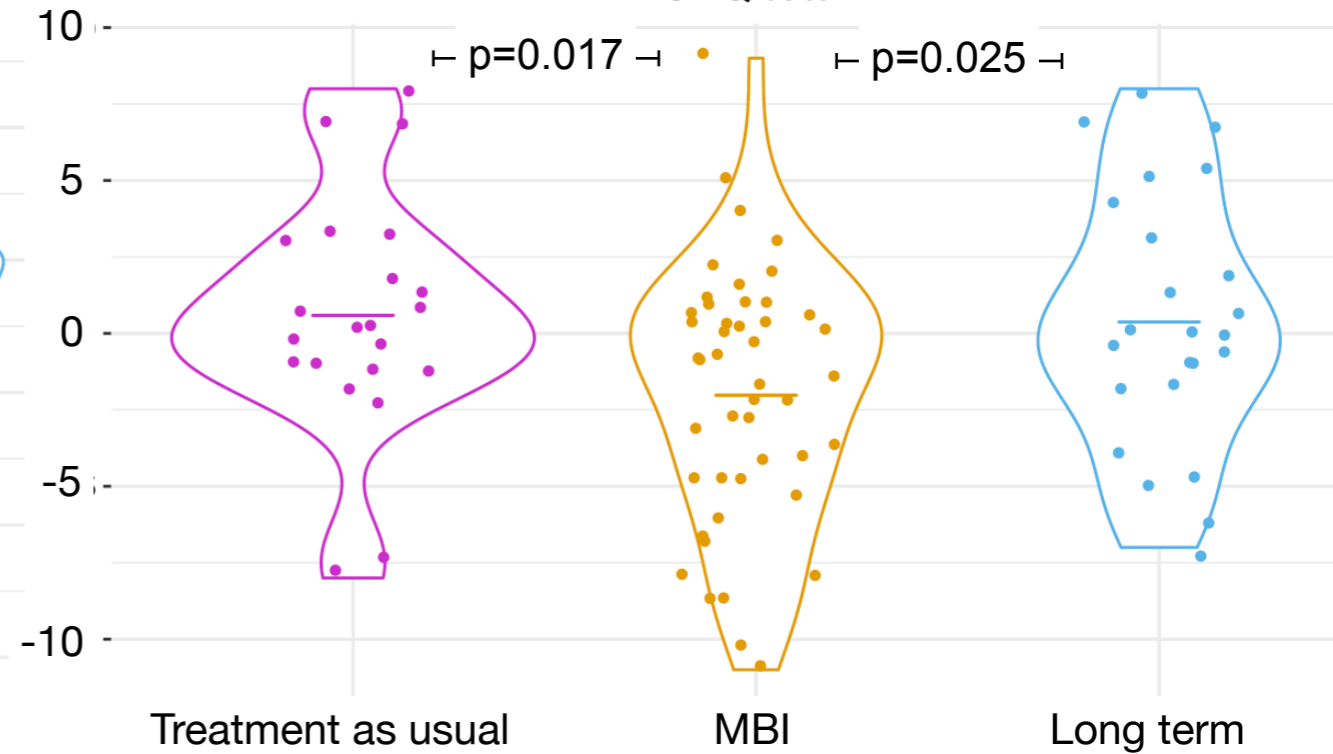

● Treatment as usual ● MBI ● Long-term

## Moderate-risk subgroup

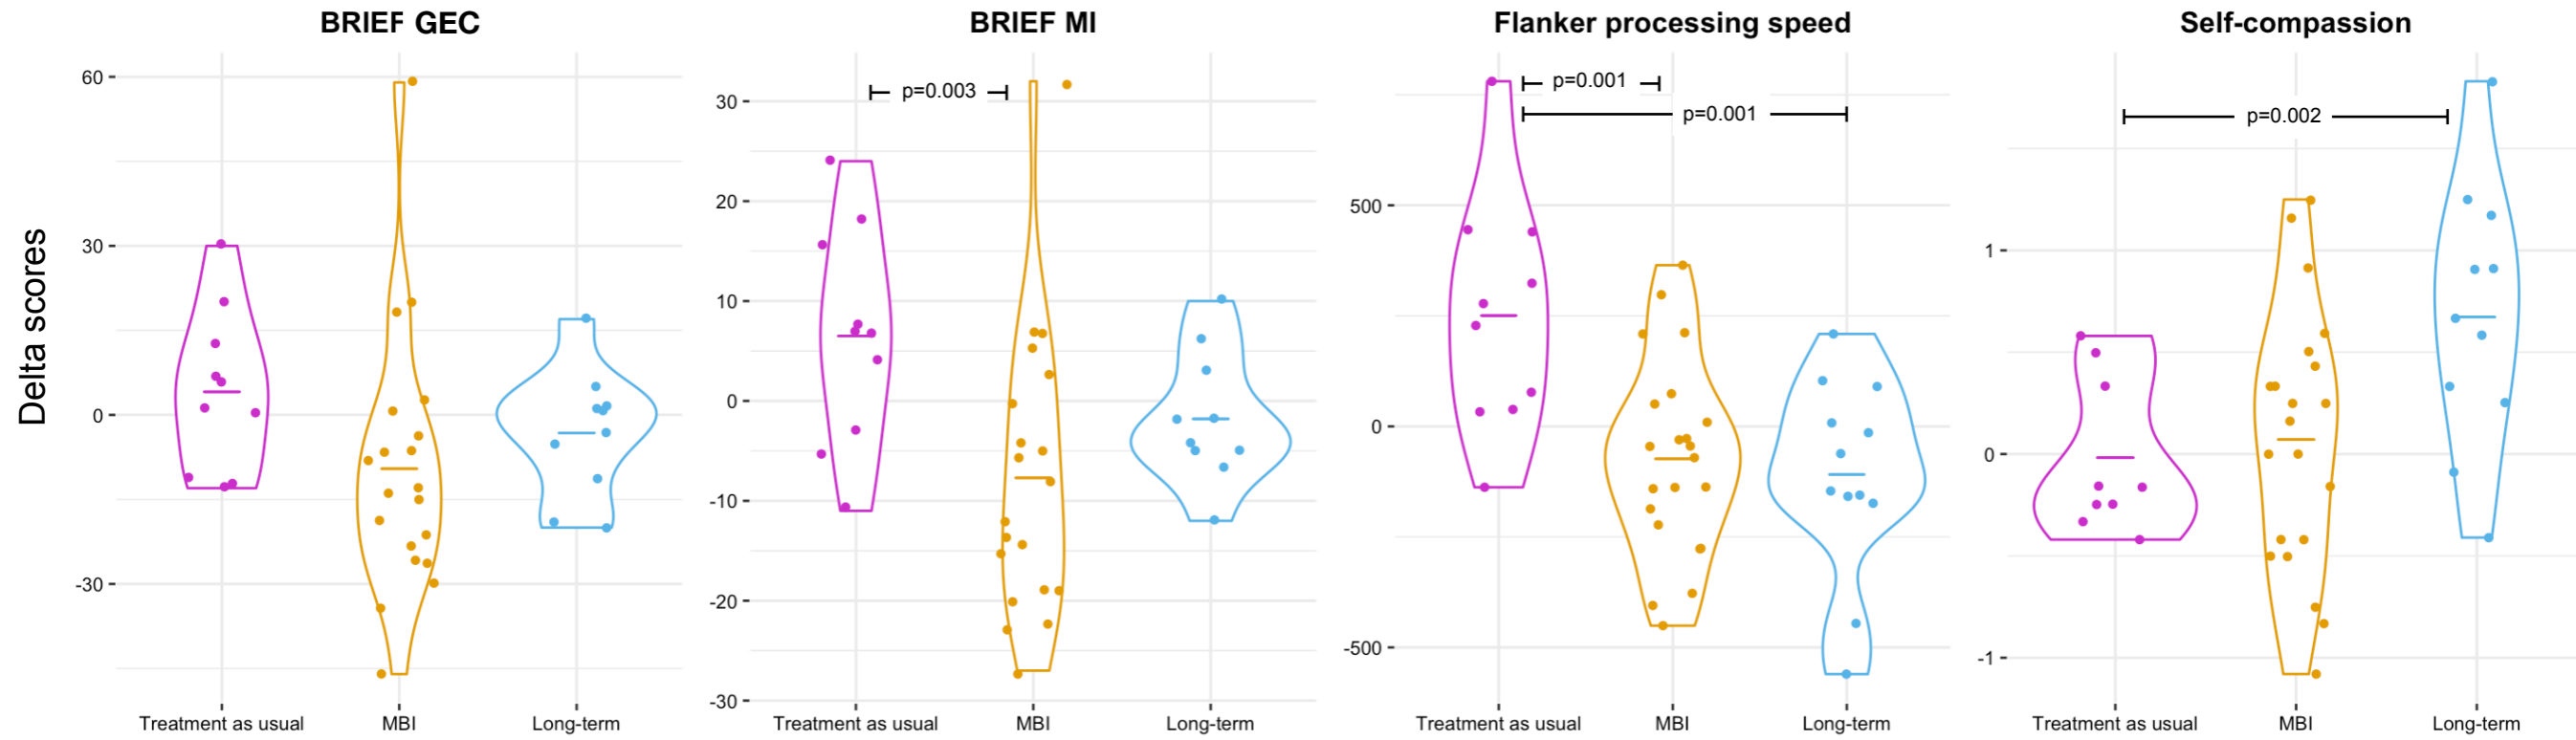

## High-risk subgroup

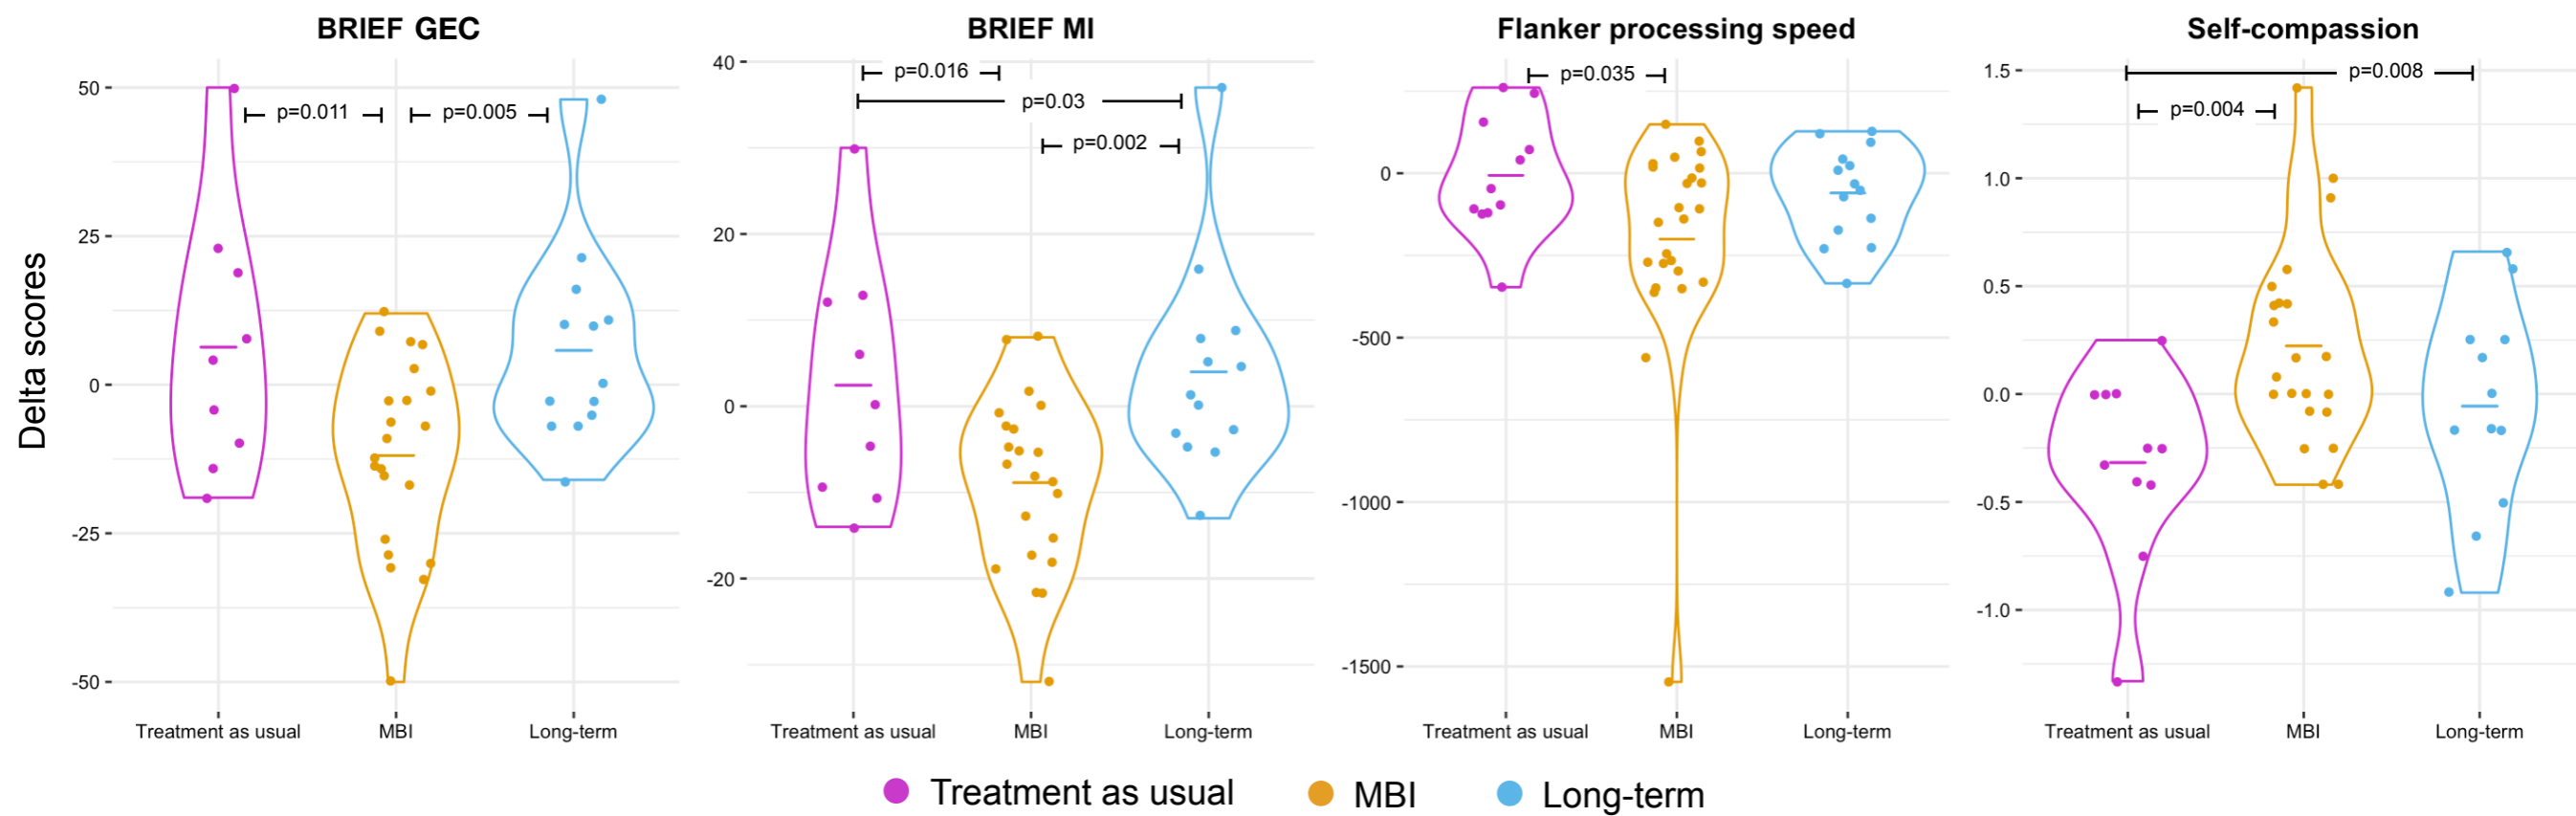

Source: https://medrxiv.org/content/medrxiv/early/2021/03/24/2021.03.14.21253449.full.pdf
